49. Lee H, Mashour GA, Noh GJ, Kim S, Lee U: Reconfiguration of network hub structure after propofol-induced unconsciousness. *ANESTHESIOLOGY* 2013; 119:1347–59
50. Nishikawa K, Kidokoro Y: Halothane presynaptically depresses synaptic transmission in wild-type *Drosophila* larvae but not in halothane-resistant (har) mutants. *ANESTHESIOLOGY* 1999; 90:1691–7
51. Sandstrom DJ: Isoflurane reduces excitability of *Drosophila* larval motoneurons by activating a hyperpolarizing leak conductance. *ANESTHESIOLOGY* 2008; 108:434–46
52. Wu XS, Sun JY, Evers AS, Crowder M, Wu LG: Isoflurane inhibits transmitter release and the presynaptic action potential. *ANESTHESIOLOGY* 2004; 100:663–70
53. Atwood HL, Karunanithi S: Diversification of synaptic strength: Presynaptic elements. *Nat Rev Neurosci* 2002; 3:497–516
54. Lisman JE, Raghavachari S, Tsien RW: The sequence of events that underlie quantal transmission at central glutamatergic synapses. *Nat Rev Neurosci* 2007; 8:597–609
55. Sun J, Pang ZP, Qin D, Fahim AT, Adachi R, Südhof TC: A dual-Ca<sup>2+</sup>-sensor model for neurotransmitter release in a central synapse. *Nature* 2007; 450:676–82
56. Melom JE, Akbergenova Y, Gavornik JP, Littleton JT: Spontaneous and evoked release are independently regulated at individual active zones. *J Neurosci* 2013; 33:17253–63
57. Peled ES, Newman ZL, Isacoff EY: Evoked and spontaneous transmission favored by distinct sets of synapses. *Curr Biol* 2014; 24:484–93
58. Xie Z, McMillan K, Pike CM, Cahill AL, Herring BE, Wang Q, Fox AP: Interaction of anesthetics with neurotransmitter release machinery proteins. *J Neurophysiol* 2013; 109:758–67
59. Littleton JT, Stern M, Perin M, Bellen HJ: Calcium dependence of neurotransmitter release and rate of spontaneous vesicle fusions are altered in *Drosophila synaptotagmin* mutants. *Proc Natl Acad Sci U S A* 1994; 91:10888–92
60. Stewart BA, Mohtashami M, Trimble WS, Boulianne GL: SNARE proteins contribute to calcium cooperativity of synaptic transmission. *Proc Natl Acad Sci U S A* 2000; 97:13955–60
61. Metz LB, Dasgupta N, Liu C, Hunt SJ, Crowder CM: An evolutionarily conserved presynaptic protein is required for isoflurane sensitivity in *Caenorhabditis elegans*. *ANESTHESIOLOGY* 2007; 107:971–82

## ANESTHESIOLOGY REFLECTIONS FROM THE WOOD LIBRARY-MUSEUM

“Pure Nitrous Oxide” Advertised by F. D. Davis, D.D.S.

**DR. F. D. DAVIS**

is a GRADUATE of the Pennsylvania College of Dental Surgery, and is the ONLY dentist in Minerva who is a graduate.

His office is supplied with all the latest improved appurtenances for the skillful practice of Oral Surgery.

He makes a SPECIALTY of gold, amalgam, and plastic fillings—inserting artificial crowns on the roots of frail teeth, and the treatment of all diseases pertaining to the Oral Cavity.

Artificial teeth are the only substitute for the loss of the natural organs. They should always be well made, perfectly fitted, and in color, size, shape, and so far as possible, in arrangement, should duplicate the natural teeth. He attains these requirements in all cases.

Teeth extracted without pain by the use of pure Nitrous Oxide Gas.

Prices reduced and all work guaranteed.

Office: Corner Mill and High Streets, over Roller's Drug Store, Minerva, O.

Very Respectfully,  
F. D. Davis, D. D. S.,  
DENTAL OFFICE:  
Corner Mill and High Sts., Over Roller's  
Drug Store, Minerva, O.

[OVER]

[OVER]

From the town of Minerva, Ohio, Fremont D. Davis, D.D.S. (*left*), advertised painless dentistry “by the use of pure Nitrous Oxide Gas” (*right*). Sadly, his personal health was hardly pain free. While driving back into Minerva, Dr. Davis's buggy was struck after a railroad flatcar bumped into a switch. As his horse bolted, the hapless dentist was “dragged out over the dashboard and severely injured.” This trade card is part of the Wood Library-Museum's Ben Z. Swanson Collection. (Copyright © the American Society of Anesthesiologists, Inc.)

George S. Bause, M.D., M.P.H., Honorary Curator, ASA's Wood Library-Museum of Anesthesiology, Schaumburg, Illinois, and Clinical Associate Professor, Case Western Reserve University, Cleveland, Ohio. UJYC@aol.com.
